# Supplementary material for: A Novel Breast Cancer Index for Prediction of Distant Recurrence in HR+ Early-Stage Breast Cancer with One to Three Positive Nodes
Source: Oxford University Press journal article supplement (doi:10.1158/1078-0432.ccr-17-1688), 2017-09-22

**Supplemental Figure 1.** Prognostic performance of BCIN+ for overall 15-year (A, C) and late post–5-year (B, D) any recurrence (local, regional or distant) in patients with 1–3 positive nodes. A) All patients (N=402); B) All patients disease-free at Year 5 (n=349); C) Patients treated with ≤5 years of endocrine therapy (n=276); D) Patients treated with ≤5 years of endocrine therapy and disease-free at Year 5 (n=221).

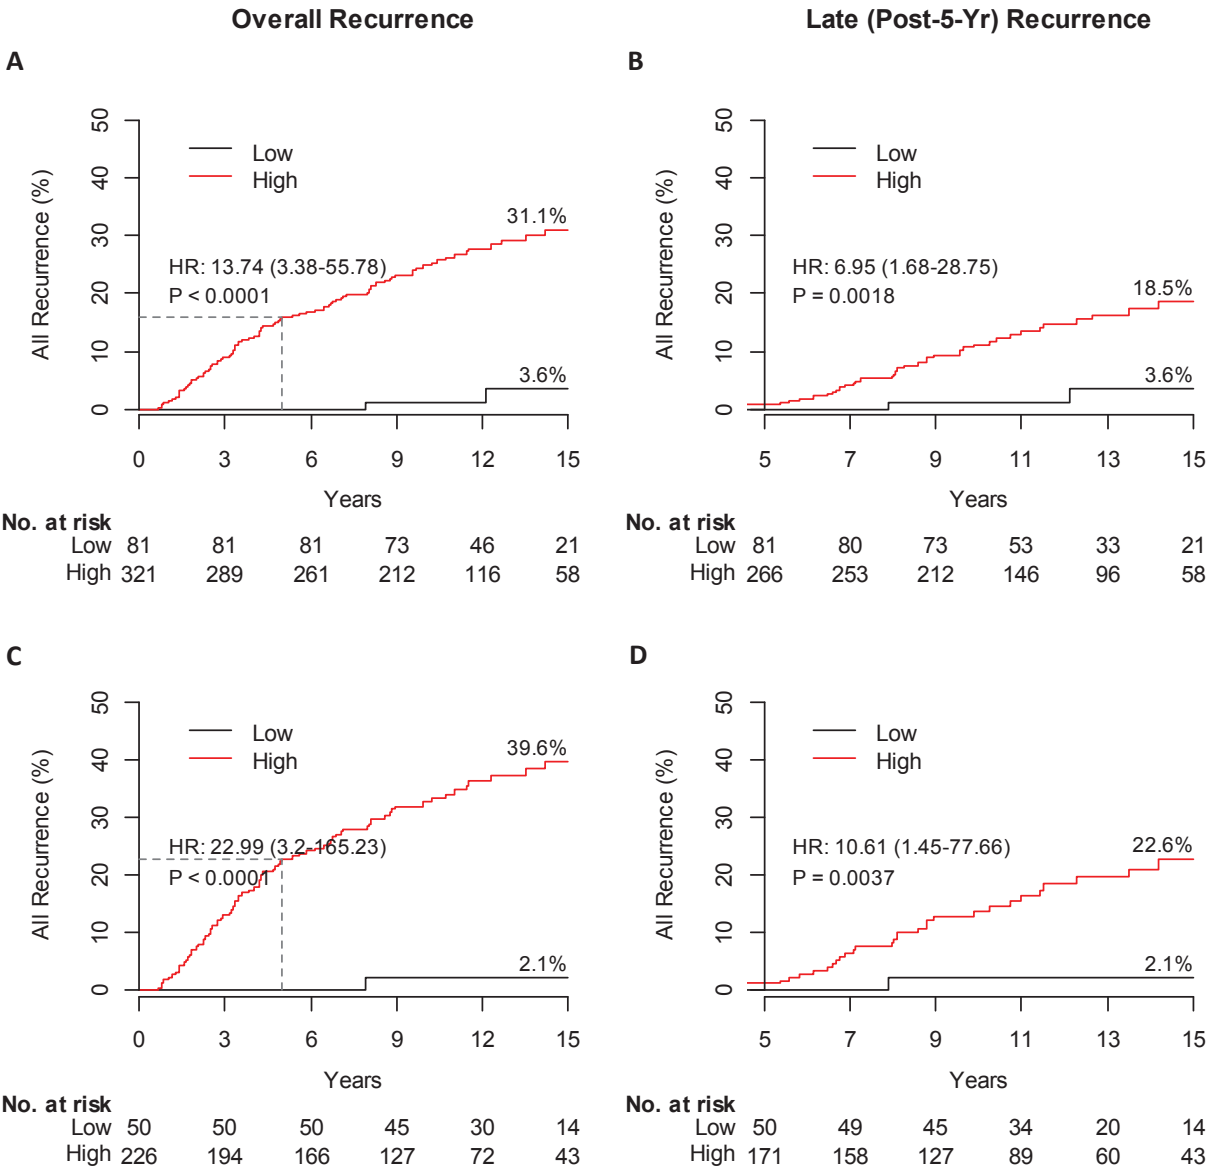

Supplement: 10780432ccr171688-sup-184790_2_supp_4245997_6vkqk6.pdf [file 10780432ccr171688-sup-184790_2_supp_4245997_6vkqk6.pdf]
